# Supplementary material for: Impact of SGLT2 Inhibitor Therapy on Right Ventricular Function in Patients with Heart Failure and Reduced Ejection Fraction
Source: MDPI journal article supplement (doi:10.3390/jcm12010042), 2022-12-21

## SUPPLEMENTAL FILE A

### A BLAND-ALTMAN ANALYSIS OF CORRELATION AND AGREEMENT BETWEEN STUDY ECHO EXPERT VS. CONTROL ECHO EXPERT

**Variable: Right ventricular free wall strain (%)**

#### 1st examination – 6 subjects

Average bias in measurement: 2.76 %

Average bias in absolute value (% RV FWS): 0.35 %

Standard deviation of bias: 5.82

95% Limits of agreement: -8.65 to 14.17

**RV FWS at 1st examination  
% Difference vs. average: Bland-Altman analysis**

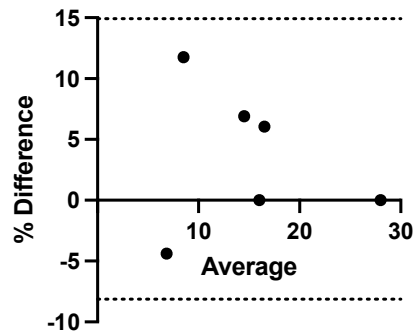

#### Follow-up examination – 6 subjects

Average bias in measurement: 4.97 %

Average bias in absolute value (% RV FWS): 1.38 %

Standard deviation of bias: 6.25

95% Limits of agreement: -7.28 to 17.21

**RV FWS at follow-up examination  
% Difference vs. average: Bland-Altman analysis**

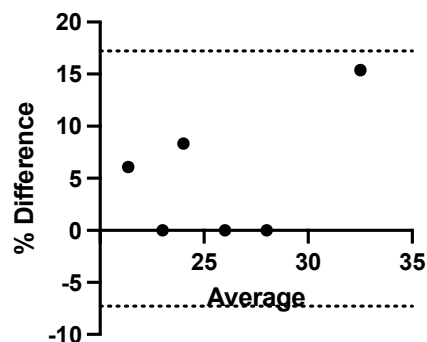

## Variable: 3D right ventricular ejection fraction (%)

### 1st examination – 5 subjects

Average bias in measurement: 2.95 %

Average bias in absolute value (% RV FWS): 1.78 %

Standard deviation of bias: 12.67

95% Limits of agreement: -21.89 to 27.80

**3D RVEF at 1st examination**  
**% Difference vs. average: Bland-Altman analysis**

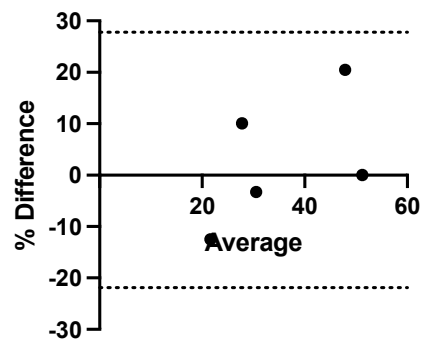

### Follow-up examination – 6 subjects

Average bias: 0.56 %

Average bias in absolute value (% RV FWS): 0.27 %

Standard deviation of bias: 3.78

95% Limits of agreement: -6.86 to 7.97

**3D RVEF at follow-up examination**  
**% Difference vs. average: Bland-Altman analysis**

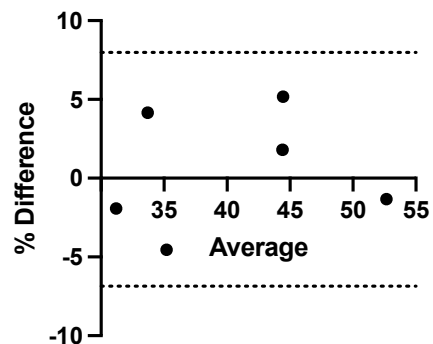

Supplement: s1 [file s1]
