# Supplementary material for: Impact of SGLT2 Inhibitor Therapy on Right Ventricular Function in Patients with Heart Failure and Reduced Ejection Fraction
Source: J Clin Med. 2022 Dec 21;12(1):42. doi: 10.3390/jcm12010042 (PMC9820989; doi:10.3390/jcm12010042)
Supplement: Supplementary file 1 [file jcm-12-00042-s001.zip]

Archive with 4 entries (4 files):
- Figure S1.tif
- Figure S2.tif
- Figure S3.tif
- File S1.pdf
